# Supplementary material
Source: PubMed Central journal article supplement (PMC6542699)

— Tak1 Expression  
— Differentiation  
— Proliferation

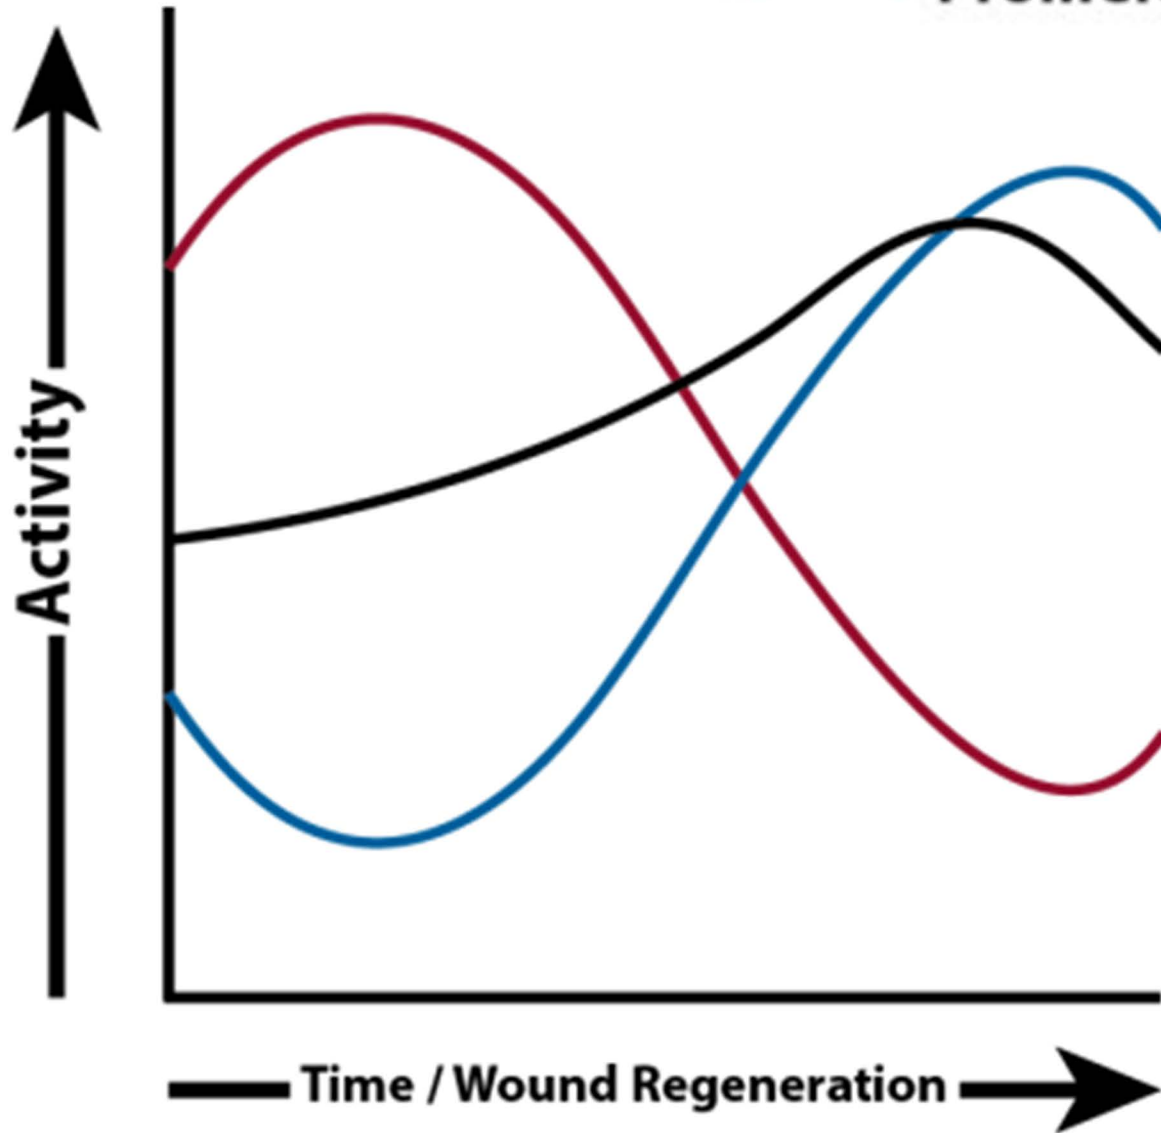

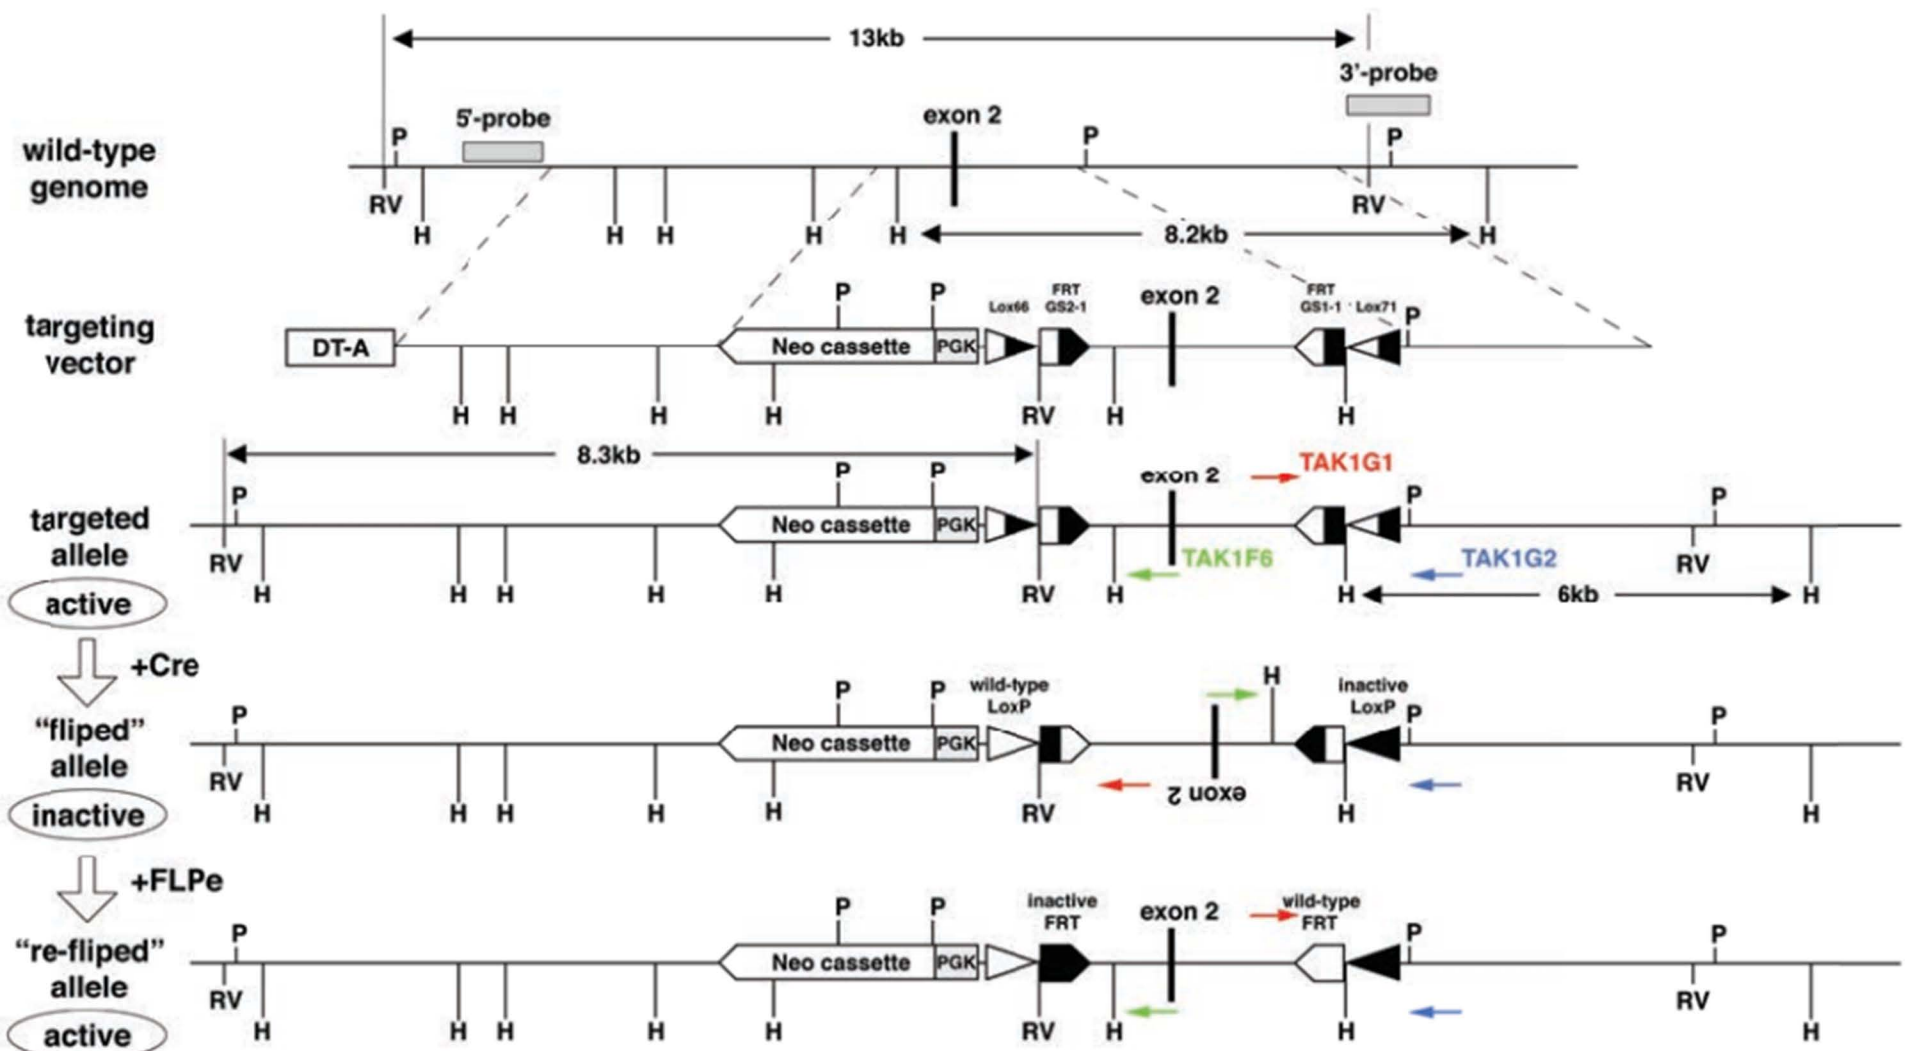

**A****Littermate**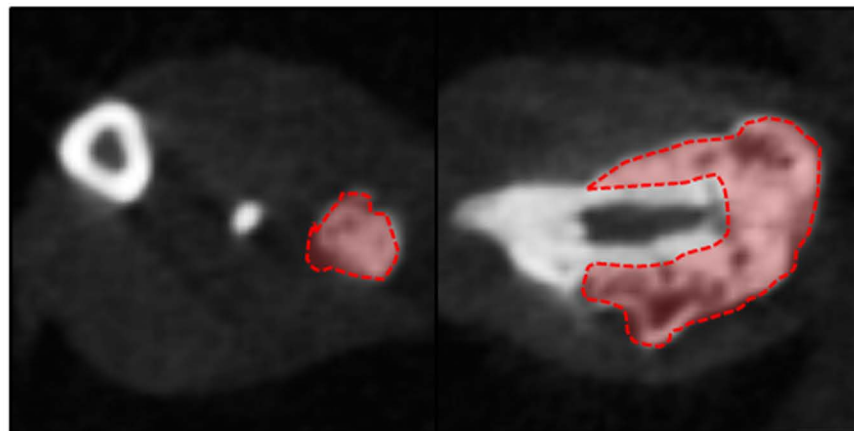***Tak1* tmKO**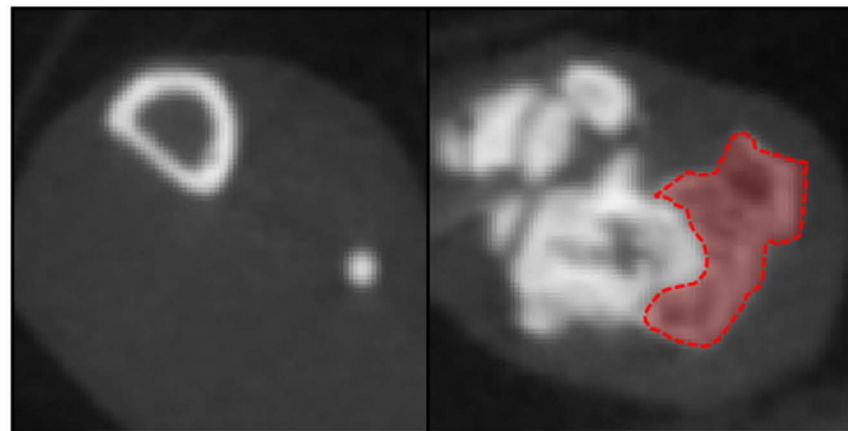**B****No Treatment**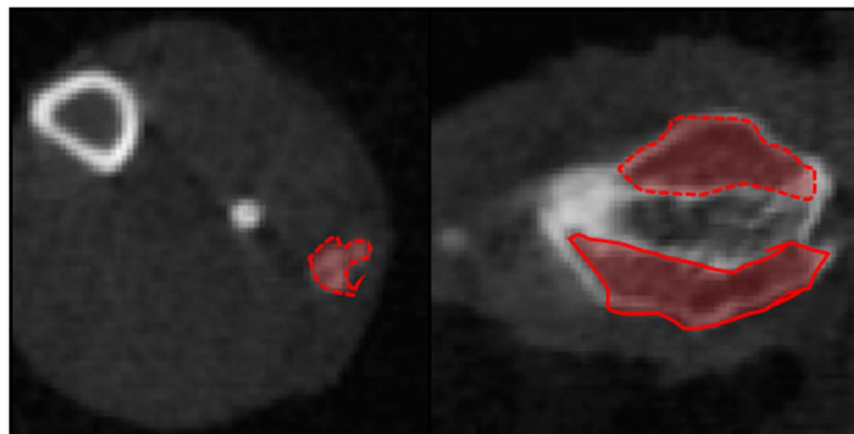**NG-25**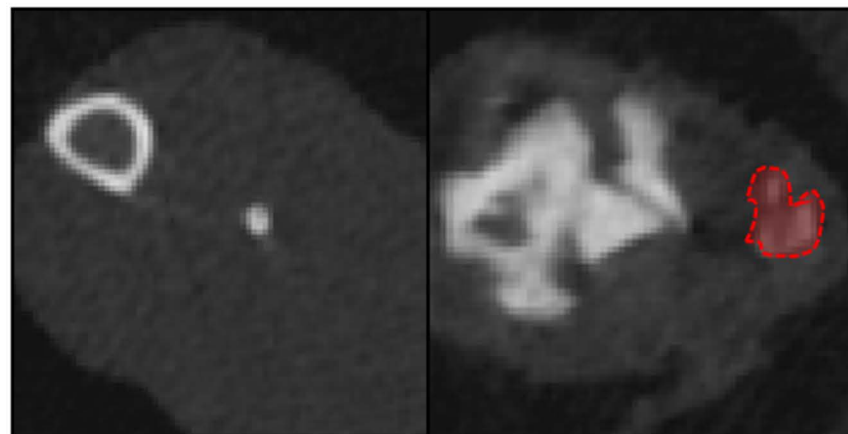

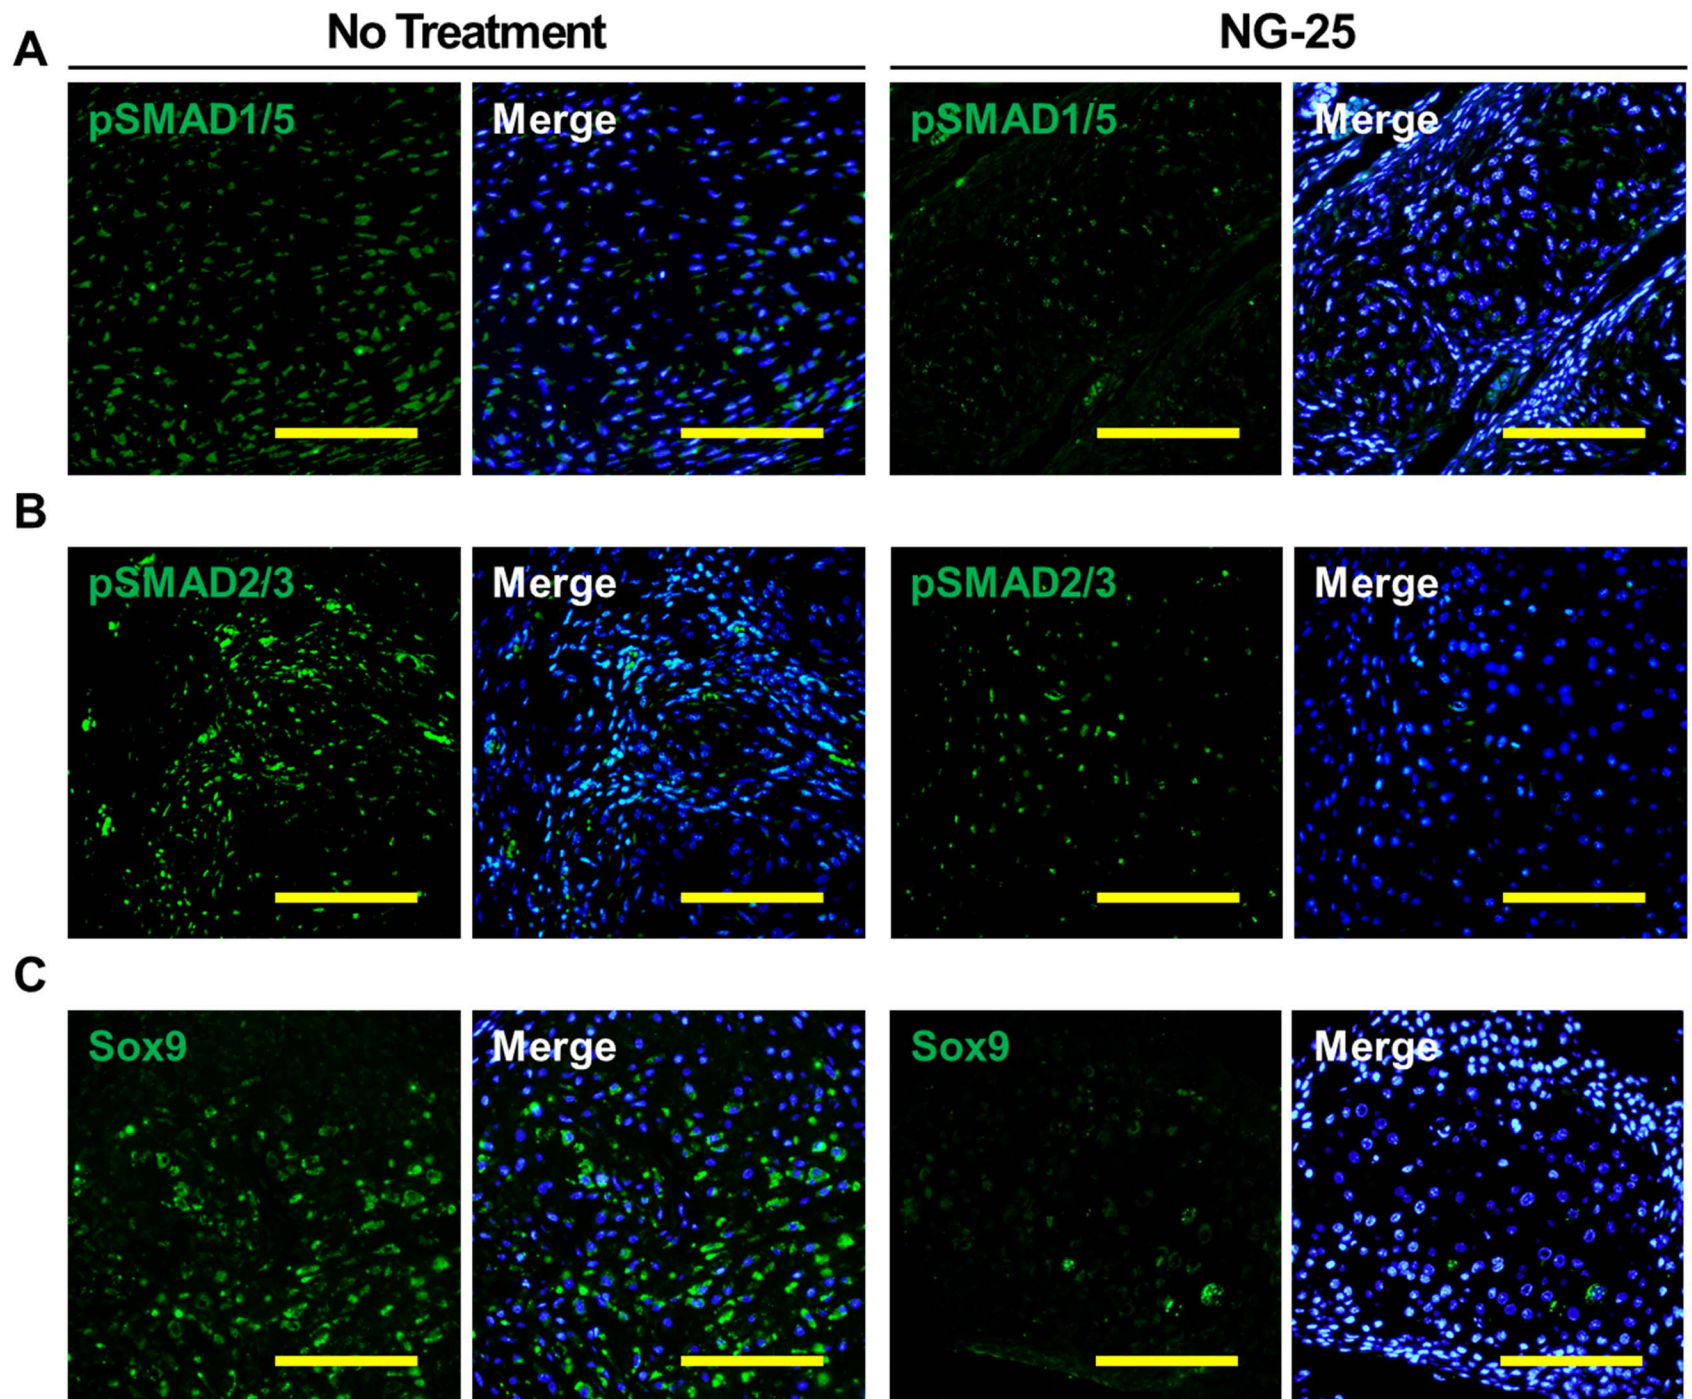

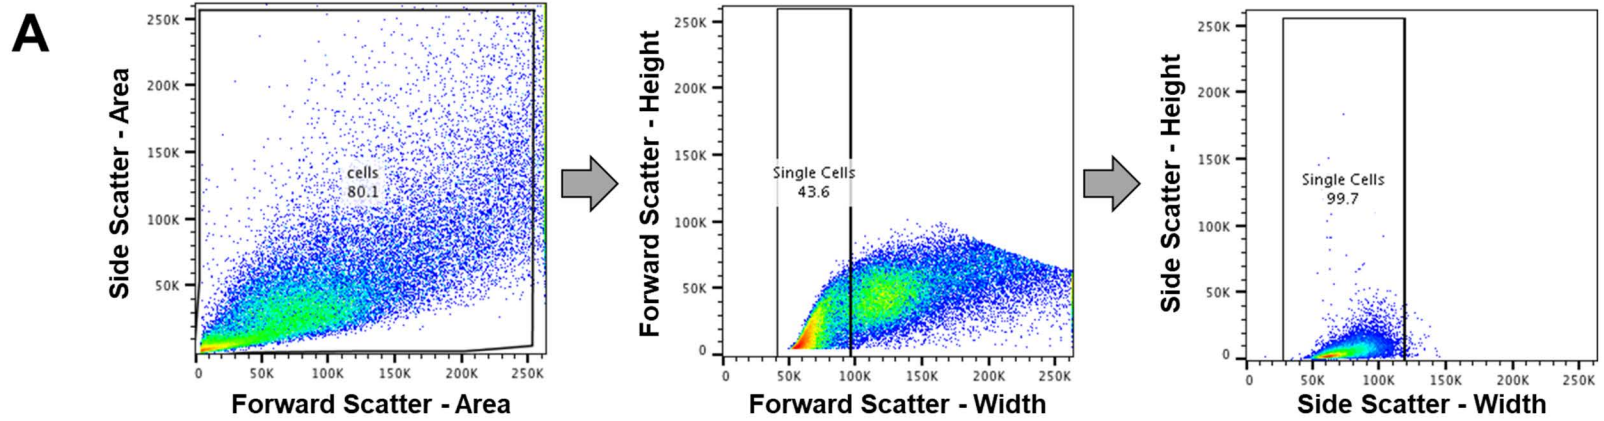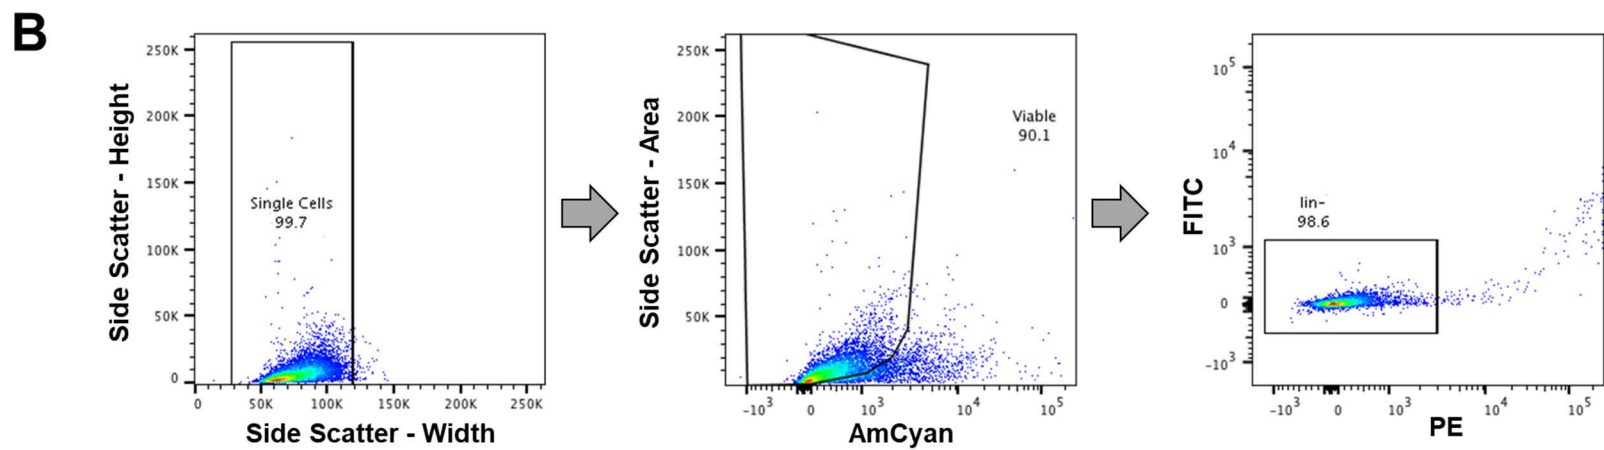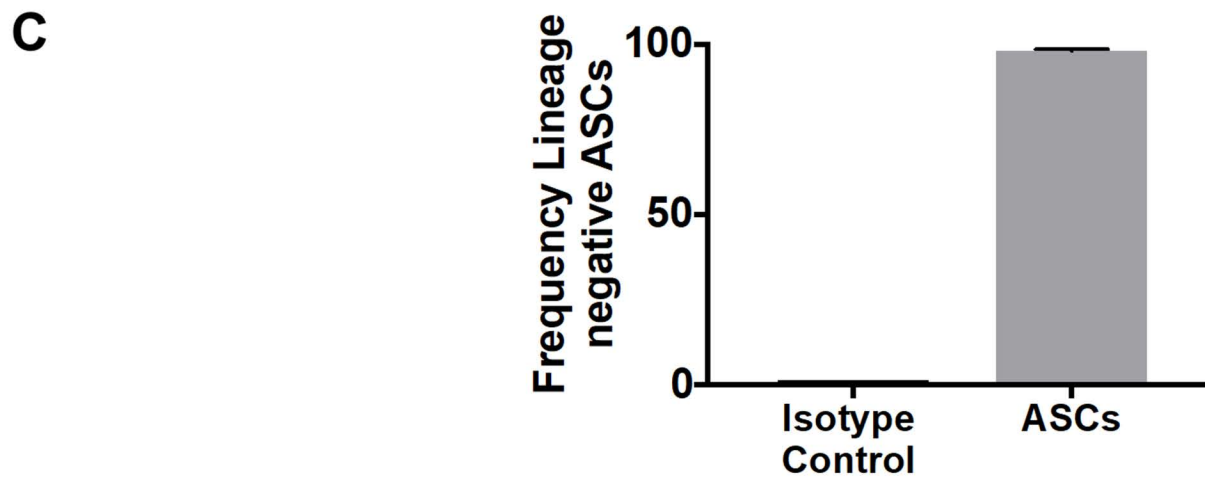

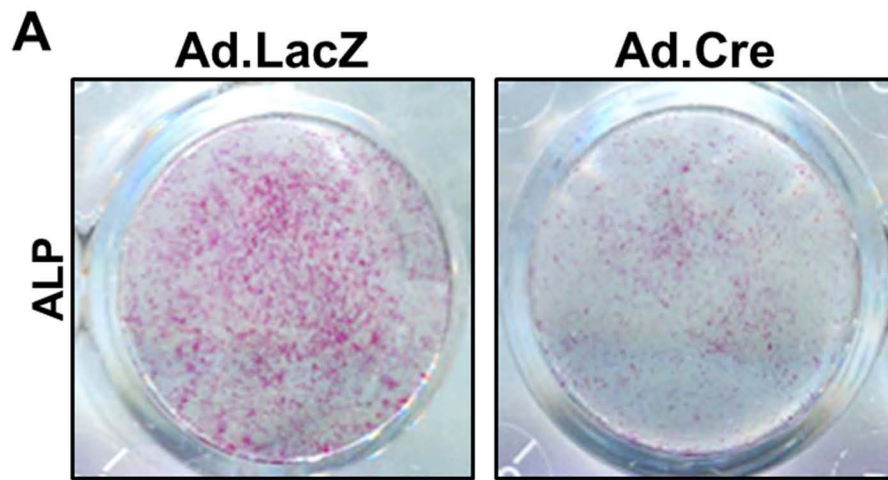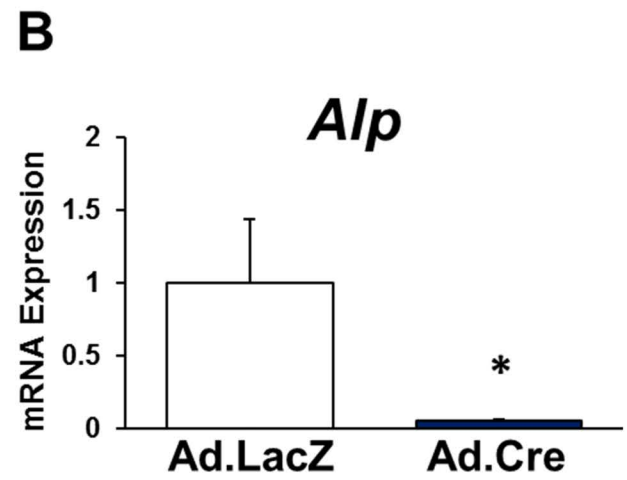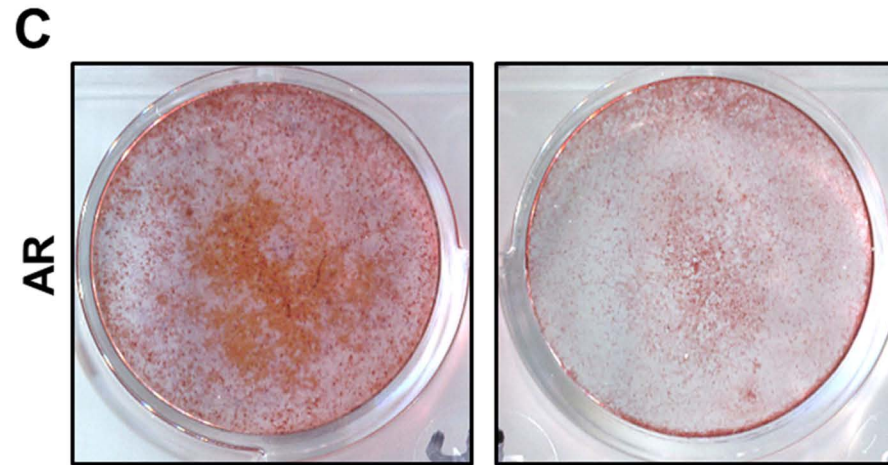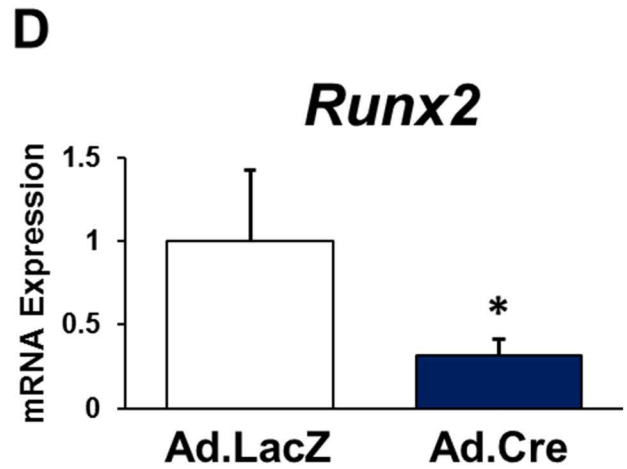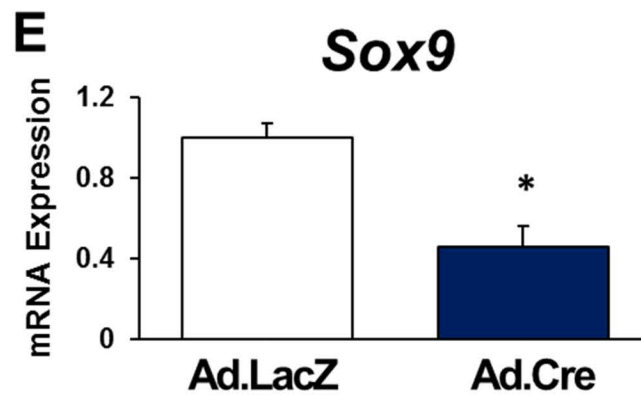

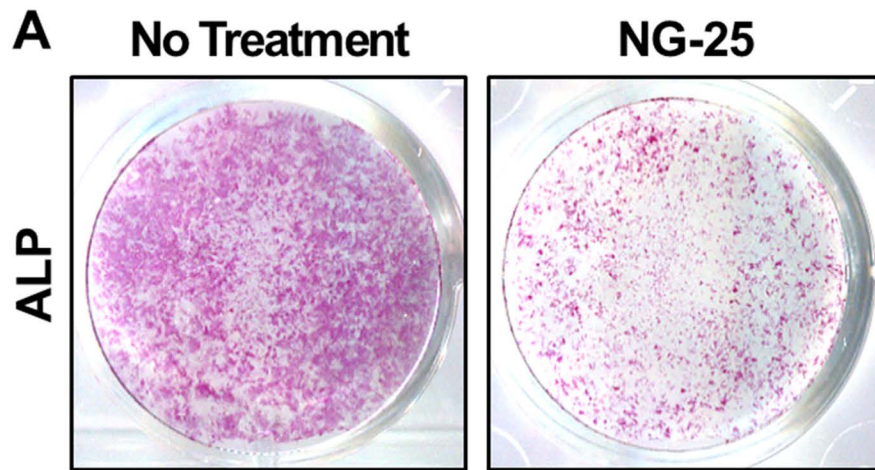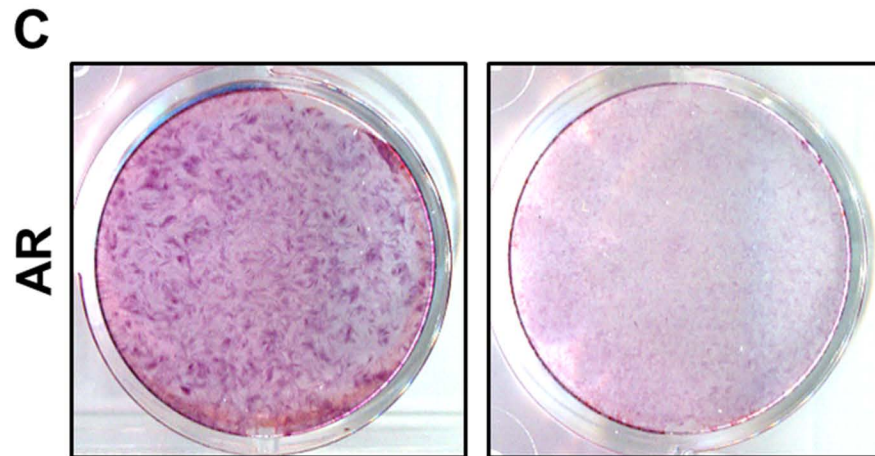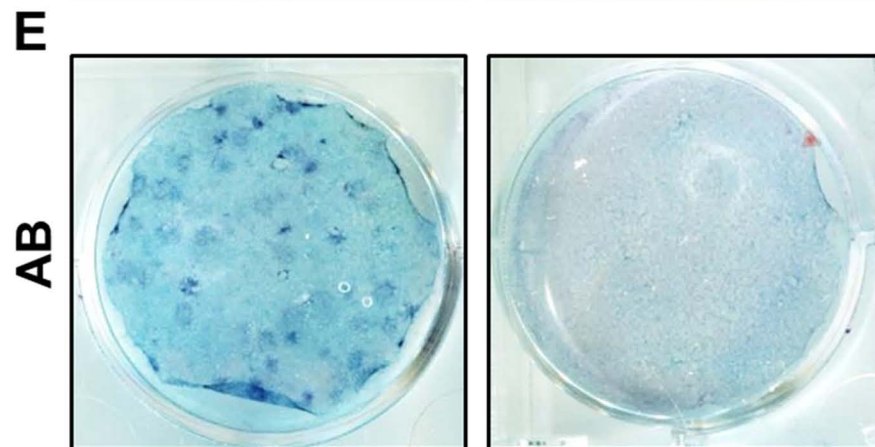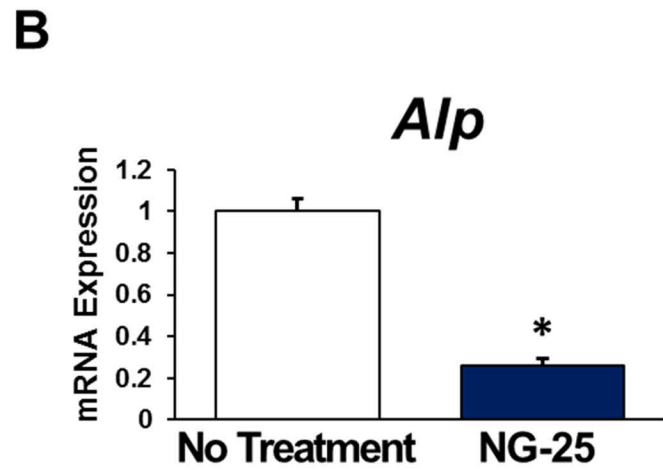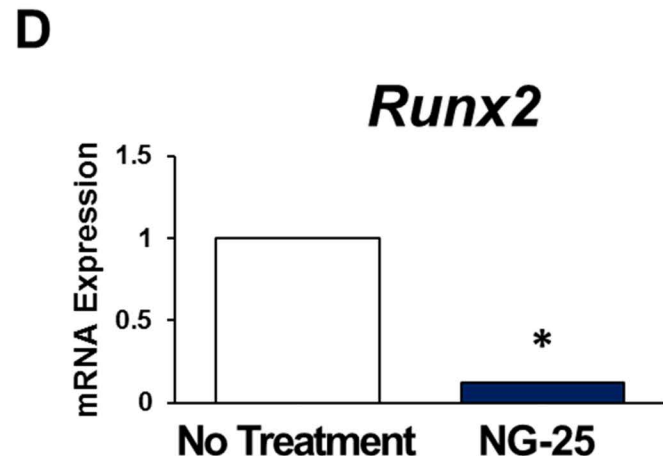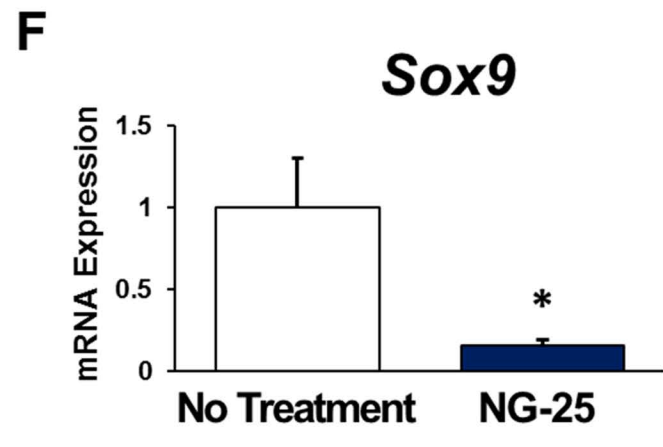

**A****BrdU**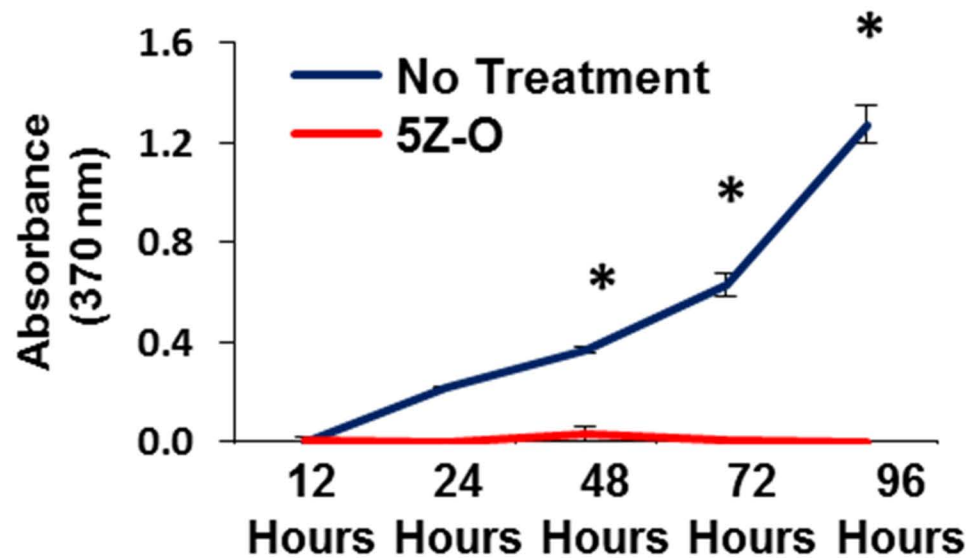**B****Cell Counts**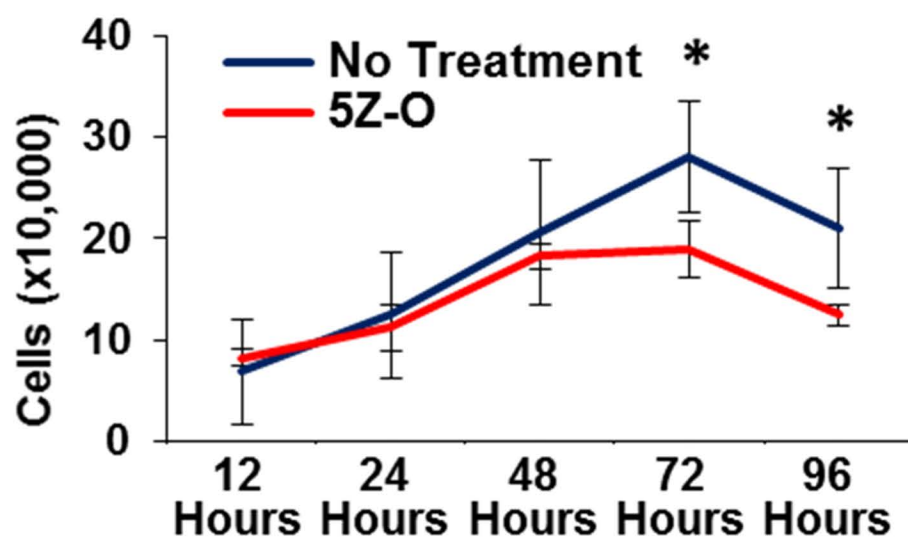



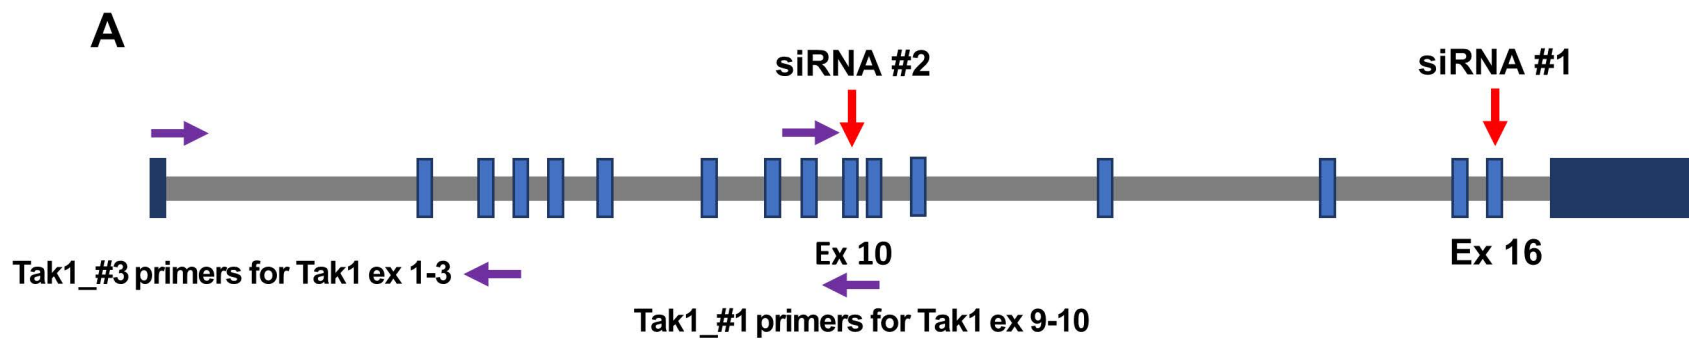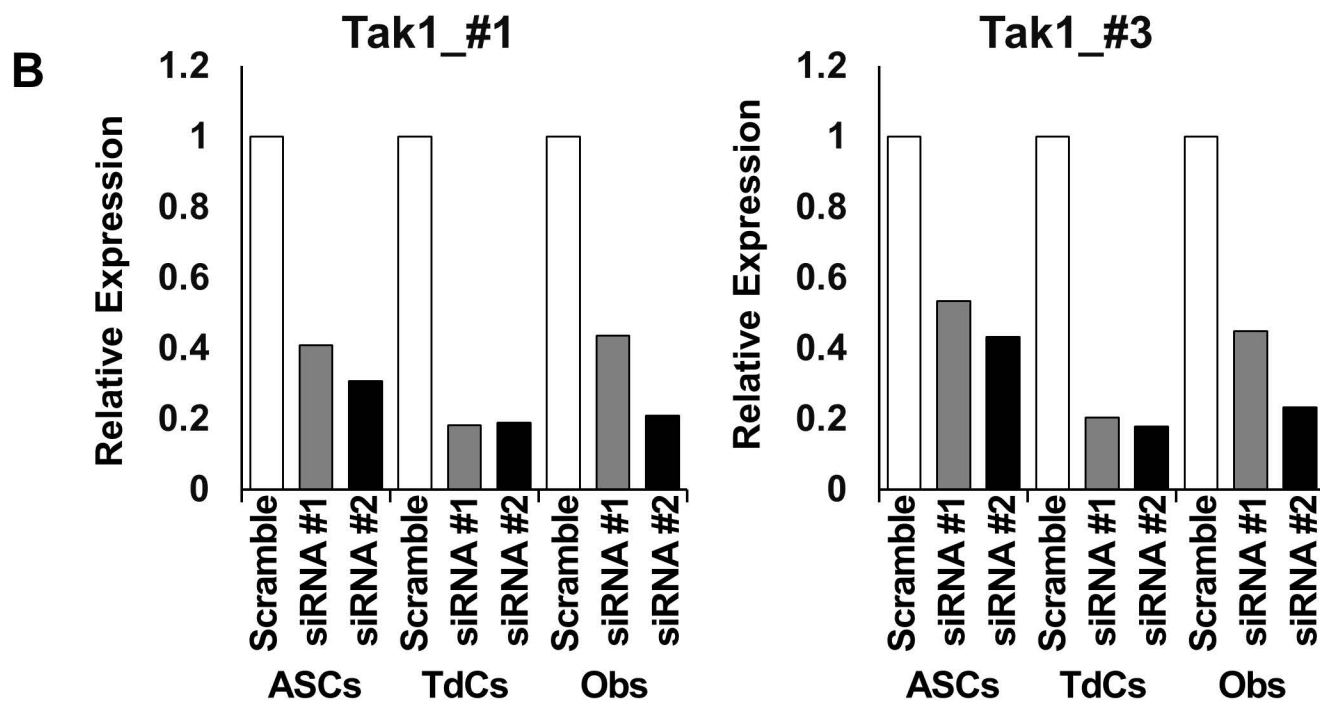

**A**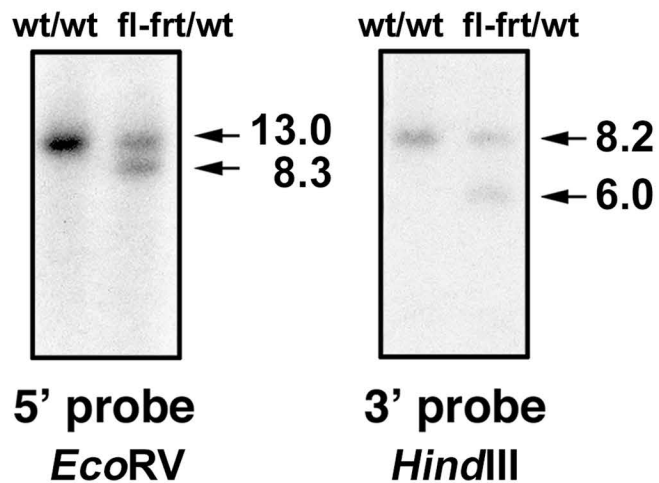**B**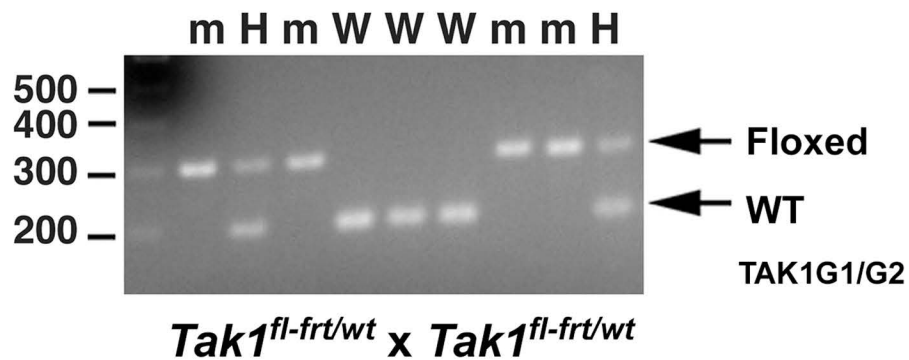**C**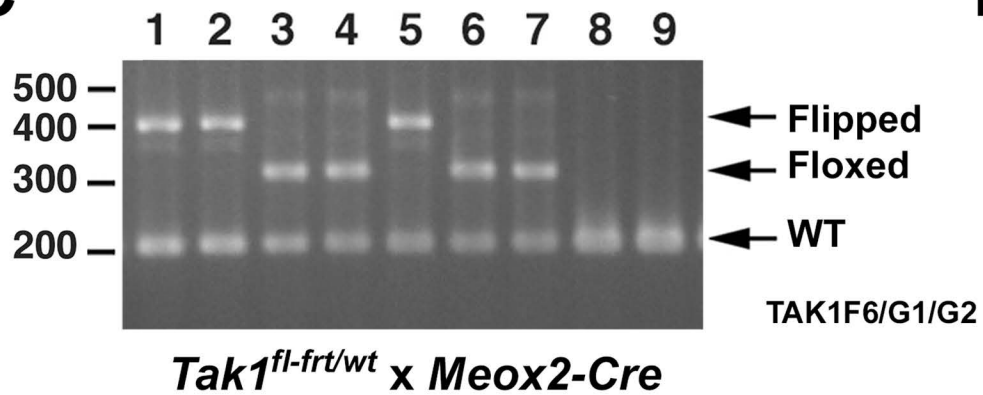**D**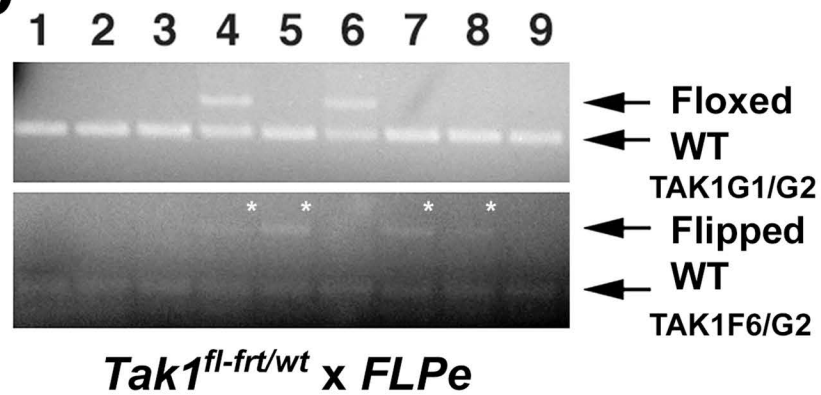

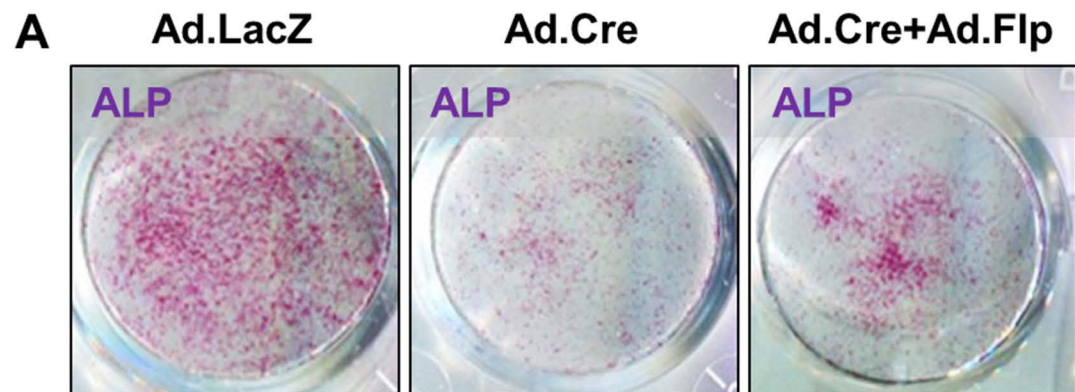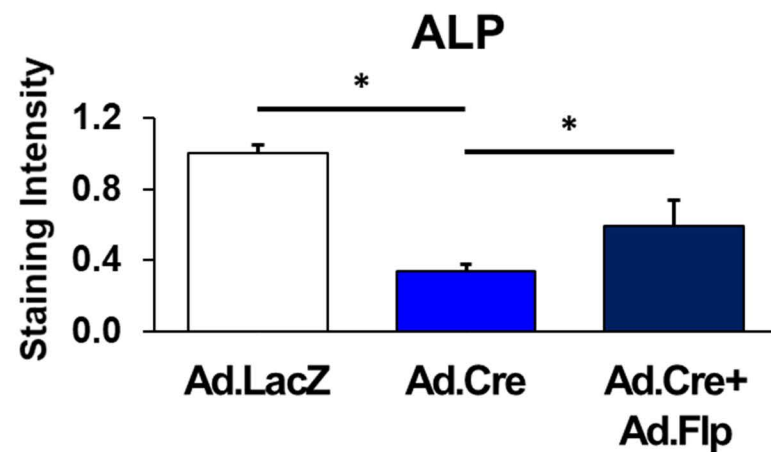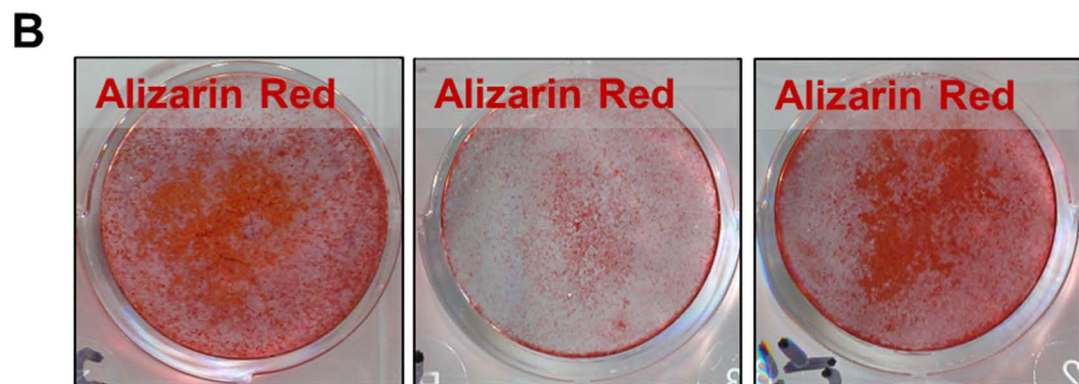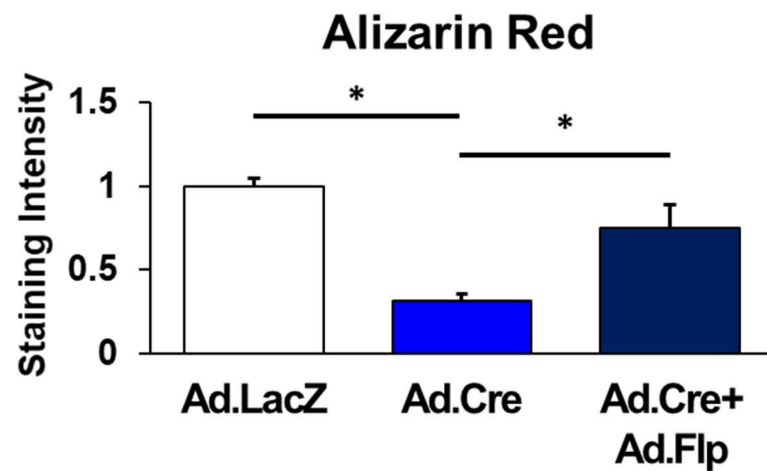

**Ad.LacZ**

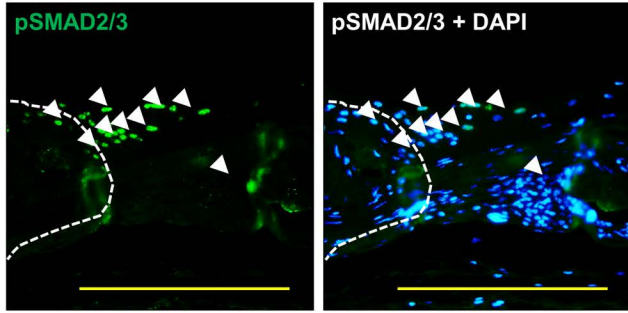

**Ad.Cre**

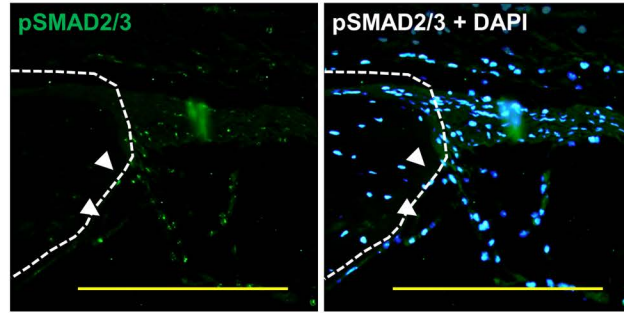

**Ad.Cre+Ad.Flp**

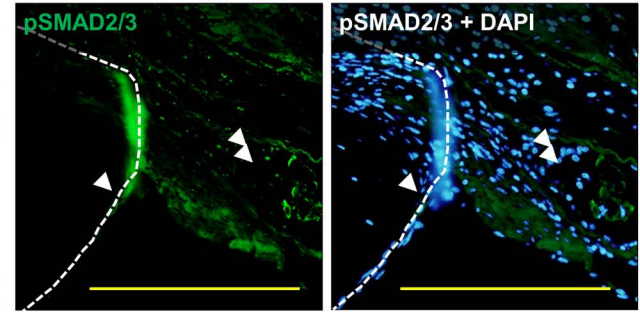

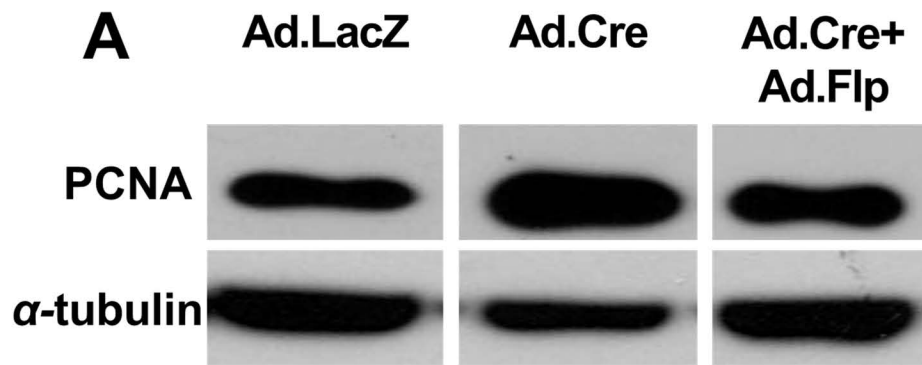

**B**

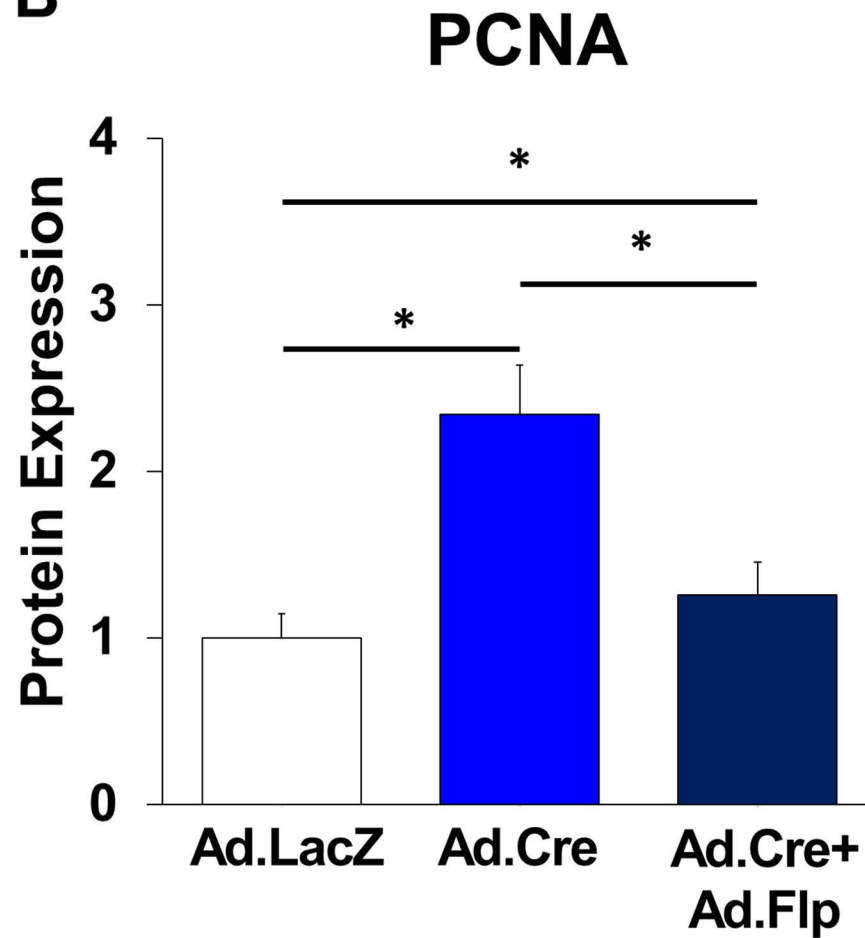

Supplement: NIHMS1017879-supplement-Supp_figS1-13.pdf [file NIHMS1017879-supplement-Supp_figS1-13.pdf]
